# Supplementary material for: Design of a novel tryptophan-rich membrane-active antimicrobial peptide from the membrane-proximal region of the HIV glycoprotein, gp41
Source: publisher site journal article supplement (doi:10.3762/bjoc.8.130), 2012-07-24
Supplement: Additional file 1 [file 1860-5397-8-130-S1.pdf]

## **Supporting Information**

for

### **Design of a novel tryptophan-rich membrane-active antimicrobial peptide from the membrane-proximal region of the HIV glycoprotein, gp41**

Evan F. Haney, Leonard T. Nguyen, David J. Schibli<sup>§</sup> and Hans J. Vogel<sup>\*,§</sup>

Address: Department of Biological Sciences, University of Calgary, 2500 University Drive NW, Calgary, Alberta, Canada, T2N 1N4

Email: Hans J. Vogel\* - vogel@ucalgary.ca

\*Corresponding author

<sup>§</sup>Current address: Ontario Genomics Institute, MaRS Centre, Heritage Building, 101 College Street, Suite HL50, Toronto, Ontario, Canada, M5G 1L7

<sup>§</sup>Phone: 1-403-220-6006

**NMR spectra and peptide connectivity analysis based on the observed NOEs and structural statistics for the calculated NMR structures**

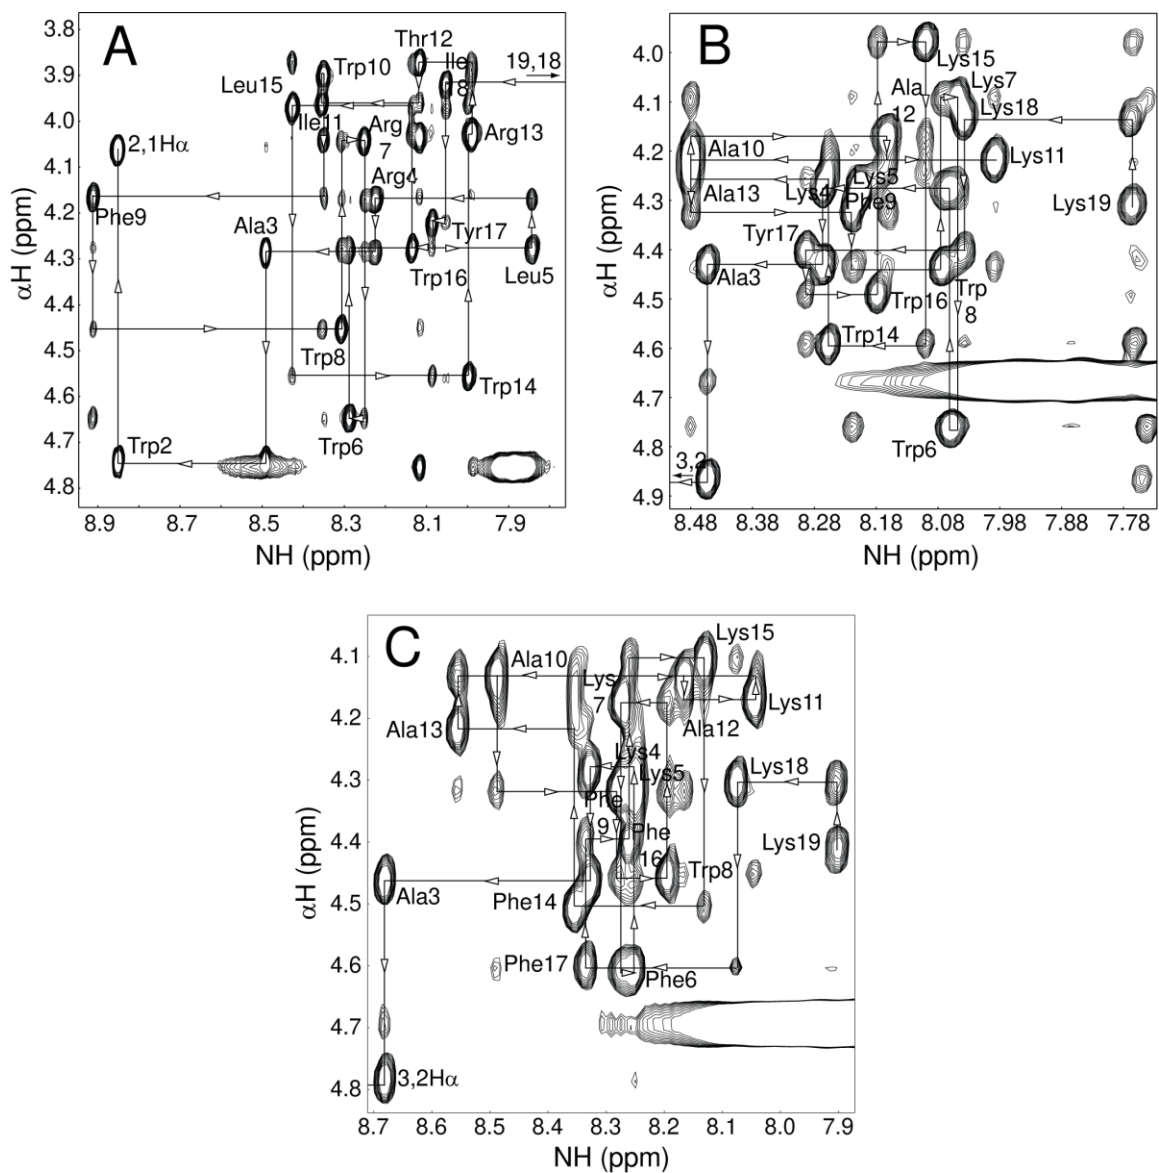

**Figure S1:** Representative regions of the 2D  $^1\text{H}$  NOESY spectra of gp41w-4R (A), gp41w-KA (B) and gp41w-FKA (C) acquired on a Bruker 700 MHz spectrometer. The  $\text{NH}$ - $\alpha\text{H}$  fingerprint regions are shown with the sequential connectivity between  $\text{NH}_i$  to  $\alpha\text{H}_{i-1}$  indicated.

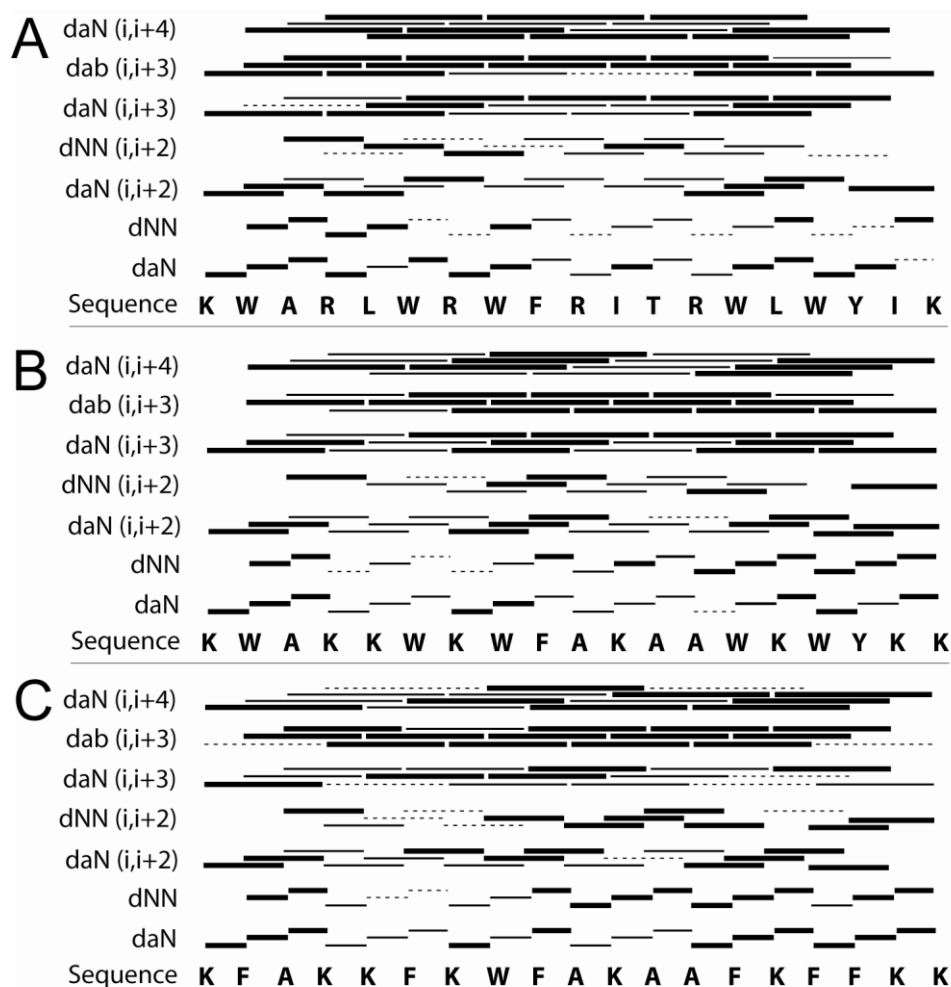

**Figure S2:** Intramolecular NOE contacts observed in the 2D  $^1$  NOESY spectra of gp41w-4R (A), gp41w-KA (B) and gp41w-FKA (C) in the miscible cosolvent mixture.

Unambiguous (thick lines) and ambiguous (thin lines) assignments were used by Aria for the simulated annealing protocol to calculate peptide conformations. Ambiguous peaks that had density in the spectra but were occluded by nearby peaks are also indicated (dashed lines), but these restraints were not included in the structure calculations.

**Table S1:** Structural statistics for the NMR solution structures of gp41w-4R, gp41w-KA and gp41w-FKA determined in a cosolvent mixture of chloroform, methanol and water.

|                                     | gp41w-4R                                          | gp41w-KA                                           | gp41w-FKA                                          |
|-------------------------------------|---------------------------------------------------|----------------------------------------------------|----------------------------------------------------|
| No. of distance restraints          |                                                   |                                                    |                                                    |
| Unambiguous NOEs                    | 369                                               | 444                                                | 328                                                |
| Ambiguous NOEs                      | 24                                                | 33                                                 | 20                                                 |
| Unassigned NOEs                     | 2                                                 | 1                                                  | 0                                                  |
| Total NOEs                          | 395                                               | 478                                                | 348                                                |
| Dihedral Restraints                 | 18                                                | 18                                                 | 18                                                 |
| RMS deviations among the structures |                                                   |                                                    |                                                    |
| Bonds (Å)                           | $1.23 \times 10^{-2}$<br>+/- $6.3 \times 10^{-5}$ | $1.22 \times 10^{-2}$<br>+/- $1.89 \times 10^{-4}$ | $1.18 \times 10^{-2}$<br>+/- $6.41 \times 10^{-5}$ |
| Angles (degree)                     | 0.688<br>+/- $1.4 \times 10^{-2}$                 | 0.819<br>+/- $1.06 \times 10^{-2}$                 | 0.684<br>+/- $6.86 \times 10^{-3}$                 |
| Impropers (degree)                  | 0.187<br>+/- $9.49 \times 10^{-3}$                | 0.461<br>+/- $8.58 \times 10^{-3}$                 | 0.185<br>+/- $9.12 \times 10^{-3}$                 |
| Dihedrals (degree)                  | 21.1<br>+/- 1.20                                  | 20.8<br>+/- 1.07                                   | 17.2<br>+/- 0.672                                  |
| Pairwise atom RMSD (Å)              |                                                   |                                                    |                                                    |
| All atoms                           | 1.618                                             | 1.380                                              | 1.302                                              |
| Heavy atoms                         | 1.297                                             | 1.087                                              | 0.963                                              |
| Backbone                            | 0.630                                             | 0.389                                              | 0.426                                              |
| Ramachandran space (%) <sup>a</sup> |                                                   |                                                    |                                                    |
| Most favoured                       | 82.1                                              | 76.8                                               | 85.3                                               |
| Additionally favoured               | 17.9                                              | 22.9                                               | 14.7                                               |
| Generously allowed                  | 0.0                                               | 0.3                                                | 0.0                                                |
| Disallowed                          | 0.0                                               | 0.0                                                | 0.0                                                |

<sup>a</sup>Calculated by Procheck (42).
